# Supplementary material for: Long-term intake of thermo-induced oxidized oil results in anxiety-like and depression-like behaviors: involvement of microglia and astrocytes
Source: Royal Society of Chemistry journal article supplement (doi:10.1039/d3fo05302d), 2024-01-01
Supplement: d3fo05302d1.xlsx [file d3fo05302d1.xlsx]

## Sheet: lipid
Metabolite name		FA 5:0	FA 8:0	FA 9:0	FA 10:0	beta-D-Allose	FA 11:0	FA 12:0	FA 13:1	FA 13:0	Pantothenic acid	FA 14:1	FA 14:0	FA 15:4	FA 15:2	FA 15:1	FA 14:1;O	FA 15:0	FA 14:0;(2OH)	FA 16:4	FA 16:3	FA 16:2	FA 15:2;O	FA 16:1	FA 16:0	FA 14:1;2O	FA 17:3	FA 17:2	Inosine	FA 16:2;O	FA 17:1	FA 16:1;O	FA 17:0	FA 16:0;(2OH)	FA 18:4	FA 18:3	FA 17:3;O	FA 18:2	FA 18:1	FA 16:2;2O	FA 18:0	FA 16:1;2O	FA 19:5	FA 18:5;O	FA 19:4	FA 18:4;O	FA 19:3	FA 18:3;O	FA 19:2
AL-PO1	Control	110870	171450	45967	1783686	3977235	179292	148930	104753	78777	1844623	17807442	28271	218260	191138	61678	246727	45206	300145	409277	5336062	11784570	78331	404205056	381210	333478	204959	632776	8910376	457628	211967	2414465	54514	2547980	2370157	78787112	104512	12011	99249408	350824	625241	418225	87765	180326	56261	175482	224426	1257502	112685
AL-PO2	Control	119655	225542	51977	1715179	3087624	173870	269227	103157	412852	2020068	14975138	88600	186564	241997	99135	226629	39715	254884	423383	4706142	10723901	75317	383615168	423081	201336	231067	496928	7641854	490774	84482	1949200	59689	1947873	13941950	102179520	109193	71531	60547264	206182	868790	337830	98920	178727	278909	220779	92949	1451728	512039
AL-PO3	Control	138680	154322	136414	1757707	4496512	173355	230067	117304	91334	2523816	16167179	43223	92718	312987	73850	317737	31356	338352	427386	5914096	12376435	81915	408245216	2286972	255906	296160	761417	8780047	487905	49573	2290893	66635	2379724	15457762	107758728	191408	428429	72672712	249548	842295	352224	136147	224910	100495	240145	108867	1629153	118563
AL-PO4	Control	48701	140057	245932	1629027	3677688	169042	273407	111798	448107	1600912	15702571	81044	71246	226422	124859	260234	39225	238701	452292	5397538	12228689	76613	418435488	2187638	211127	239417	751800	7892294	454161	29569	2133154	66586	2224086	12635718	99686280	119108	145705	34341836	208967	787727	327340	110831	148040	372695	189261	83598	1333854	591030
AL-PO5	Control	89745	232107	497009	1902797	2002439	224329	128499	136481	602322	3149460	17448862	92514	20239	273536	661795	472084	83270	570783	89048	3903358	11096230	92856	379427840	2665868	317247	45986	21409	11014368	524991	12108	2645195	90865	2928173	9562074	86040152	256254	45711	4584312	297834	235273	430628	114559	13158	414302	257422	38239	1853164	497796
AL-PO6	Control	15831	225028	317376	2072610	4964732	200140	180221	185191	558360	2355949	19580752	89287	142963	236344	115698	387483	55829	520213	334115	5435246	10926192	68036	315742496	3113367	456073	236356	654641	13671235	587816	38293	2669498	26434	4196623	13855765	94881752	193025	50021	24933440	349881	353149	570560	151787	175201	567004	223679	68154	1747851	447678
AL-PO7	Control	132277	248406	55688	1883171	3013182	209631	305652	114739	522355	2297322	16440280	468906	235418	40880	688693	314469	104608	389006	518943	5432826	14195652	63607	38606312	453868	312831	42386	10647	11532116	557757	12330	2575140	40683	2667938	7459282	11409379	186946	41111	4993876	297338	885164	396726	118482	17033	432910	221732	31382	1698409	92685
AL-PO8	Control	16404	210827	256254	2356756	1046839	223284	317070	218731	177982	2138330	23547212	36634	74155	793805	104374	661669	13745	760438	178992	7718684	15945335	181591	388970784	589942	538109	268065	761661	20979030	800782	162032	3154162	35300	3910620	21121844	122399704	276779	251012	70983008	298562	892975	509103	149401	256373	113952	349642	235618	2814392	527620
AL-FO1	TIOO	30590	144925	72813	1428567	1758141	134617	14668	66358	361751	549956	9226756	34709	286279	137773	97408	331881	10509	230936	304684	1099874	9595676	64146	390969344	307376	175504	55171	396516	5547412	659954	214356	2387108	4549	1866633	689340	20266270	1000148	43705	95346760	236246	28637	293929	21708	89399	204937	65513	290741	763847	570292
AL-FO2	TIOO	93886	135460	46597	1574848	2521062	194087	137194	89681	73490	1848145	12204133	22718	117681	188489	43381	270374	20522	260712	370946	2075202	12283773	69748	80420992	94195	277043	87177	481047	5899789	751172	226486	2576028	7381	2124391	242235	28316028	239489	113404	110896776	287900	131643	401426	13249	23335	53482	74353	79571	1035774	110238
AL-FO3	TIOO	55581	146581	387524	1489098	1213726	136120	267495	67501	68598	1135169	9844444	34990	45711	180336	44194	216442	8967	215776	324217	1617887	10594360	69362	387827584	328056	230233	67528	454990	4041987	555468	158090	2131724	75683	1888061	211670	25150642	120129	147382	110041368	263871	1094885	347904	37158	55577	57764	63030	337521	629322	114749
AL-FO4	TIOO	24401	151106	350495	1536764	5624996	203206	178440	112607	506836	3258659	14040971	66654	57323	321607	82655	323232	15799	332614	369992	2687723	13808128	78987	490365568	2395305	343933	96486	493254	12616148	749301	24340	2745594	55996	2206319	1488720	34554892	142690	25410	75197496	344173	865543	432443	78635	91710	96469	108410	285874	1188124	712261
AL-FO5	TIOO	42950	240898	338564	1923340	5568006	209104	62145	128463	613165	2438751	19521342	70686	47129	283117	144908	462033	16845	536168	380548	2792838	16121531	97653	219516272	3096246	440727	116333	417980	17862434	789437	8107	3221524	25915	3643222	1893407	42351368	178222	205980	58232780	376537	290740	555783	79358	31066	376433	138303	340509	1620374	791418
AL-FO6	TIOO	50177	166307	114408	1890950	2931944	195978	332801	99059	472932	1592676	14979756	81112	46138	293838	166054	453107	51138	407770	342675	2484032	15335515	105585	494604768	3547270	387054	103068	416424	6537420	777765	10438	2957226	107059	2869982	1654970	40578792	177541	239132	50991892	352895	1370601	512246	71343	56855	360899	105541	255287	1272797	747425
AL-FO7	TIOO	19586	241659	407578	1697190	3514651	183797	229076	75801	474597	1505589	12394111	78477	65116	213663	125037	320517	34141	377315	436708	2037132	15251840	79544	533013440	2722837	318554	88173	403187	9096443	755626	17664	2587132	70219	1926730	1374766	36725664	186736	216384	76120168	333320	903056	369057	57763	63672	299586	145617	307981	1431347	635306
AL-FO8	TIOO	150382	195046	272204	2152723	3534613	26835	48220	12516	88007	3484430	622146	545935	45655	13560	914591	446297	15307	409597	11241	115831	518814	83853	4482785	2310111	379948	6950	4771	11944190	1033977	54420	3305473	30003	4150777	235432	592790	151456	143927	226946	348983	1366310	651819	12403	3954	17175	64131	3595	323846	10187
[truncated: 3,340 more columns]

## Sheet: metabolomics
Metabolite name		BENZALDEHYDE	L-Proline	Betaine; CE30; CE30; KWIUHFFTVRNATP-UHFFFAOYSA-N	BETAINE	Valine	Betaine; CE30; CE30; KWIUHFFTVRNATP-UHFFFAOYSA-N	NICOTINAMIDE	NICOTINAMIDE	5-OXO-L-PROLINE	5-OXO-L-PROLINE	Pipecolic acid	CREATINE	ISOLEUCINE	Aspartic acid	Aspartic acid	HYPOXANTHINE	Hypoxanthine	Hypoxanthine	HYPOXANTHINE	Isophorone	DEOXYCARNITINE	Glutamine	Lysine	L-Glutamic acid	L-Glutamic acid	Methionine	Methionine	3-Amino-4-methylbenzamide	Guanine	Guanine	Xanthine	Histidine	5-Aminovaleric acid betaine; CE10; CDLVFVFTRQPQFU-UHFFFAOYSA-N	5-Aminovaleric acid betaine; CE10; CDLVFVFTRQPQFU-UHFFFAOYSA-N	L-Carnitine	Phenylalanine	Arginine	N-ACETYL-L-ASPARTIC ACID	N-ACETYL-L-ASPARTIC ACID	2-Amino-N-(1-methylethyl)benzamide	Tyrosine	Tyrosine	O-Phosphocholine	Gly-Leu	N-ACETYL-DL-GLUTAMIC ACID	5-Hydroxyindole-3-acetic acid	N-Acetylmethionine	DEET
AL-FO1	TIOO	9047	149067	1446	124597	68333	10697	438787	142153	630400	363161	22189	5107091	467374	211105	215087	1014031	1023283	476118	5741	25853	44294	792993	53508	1122699	161969	127260	58237	7679	97828	18391	301799	127593	13536	40082	488769	632299	450775	242714	749255	14331	53220	264797	517344	952	25383	18183	5354	163562
AL-FO2	TIOO	9363	144657	3424	107892	51468	5657	279860	129261	558890	251083	16355	3552780	352520	306483	182302	747168	700833	501552	2243	22881	42685	563821	40435	972528	77232	93876	47126	4749	53842	19089	197215	112788	9889	33156	352345	473865	378559	267488	601866	12971	39245	182809	289146	2614	20827	7397	4238	150195
AL-FO3	TIOO	9410	258678	12772	158823	144854	6000	1334797	263435	899353	651926	27920	9759816	1406458	361381	455878	2572699	2457414	669342	5638	25637	104360	1321979	75362	1425412	369533	346038	101473	6915	260731	22833	600340	83580	43390	59421	890938	1824226	568449	231854	1506066	13292	66620	675988	699922	22611	77293	95312	25939	121835
AL-FO4	TIOO	9344	236788	36609	529377	190103	17081	948245	257699	824755	706861	26240	7449366	949195	328507	426839	2209343	2071927	709571	11793	26455	71660	1245829	61756	1248890	317370	259618	70981	316388	209488	20798	595990	263163	41999	59072	616622	1340765	480766	271790	1364398	752571	54661	445869	802281	3514	58157	32823	12681	137289
AL-FO5	TIOO	9224	173980	33735	164874	90138	18954	764070	275954	917722	473201	28282	7312599	667864	387357	379034	1224293	1860828	627908	5006	27300	95294	1255738	65282	1527573	275916	201421	69158	24534	232415	43389	312900	197337	32336	55306	605129	1019556	531262	456472	1276957	62558	51091	353350	937732	15503	48654	47887	28574	123378
AL-FO6	TIOO	9277.6	192634	17597.2	217113	108979	11677.8	753152	213700	766224	489246	24197.2	6.63633e+06	768682	318967	331828	1.55351e+06	1622857	596898	6084.2	25625.2	71658.6	1036072	59268.6	1.25942e+06	240404	205643	69395	72053	170861	24900	401649	156892	28230	49407.4	590761	1.05814e+06	481962	294064	1.09971e+06	171145	52967.4	384563	649285	9038.8	46062.8	40320.4	15357.2	139252
AL-PO1	Control	8418	126568	26353	113757	54275	17934	574905	219921	781737	439868	17785	6463624	436582	360293	288625	1224422	1409334	617506	5137	24598	68933	962608	45104	1318885	181635	118150	45210	8478	141697	21529	386926	131333	16542	40169	496881	700379	400094	273582	981144	12730	40815	236696	561553	10527	45796	30184	5410	120006
AL-PO2	Control	10850	129712	35850	89590	81924	16085	666504	193683	637309	481705	13740	6075269	478209	355793	348153	1414134	1534037	537057	3788	26938	77350	822992	49764	1044542	175981	148221	51446	8120	132356	18375	403536	126410	24956	44044	593406	653985	364562	245671	978413	12088	42352	297202	576914	2562	43759	41508	6208	151147
AL-PO3	Control	7853	133325	27247	2026335	149398	53808	648176	181448	625054	479215	23243	5402014	637968	290925	247908	1442131	1249647	553802	5404	26577	52362	823028	57832	1111920	166543	173037	57895	534611	93943	14094	372495	150822	9893	12511	461372	850402	365539	196241	708538	1159035	49483	407961	533929	12638	34613	37701	7896	166786
AL-PO4	Control	8345	149778	20544	142711	96709	15174	951928	248516	732121	645037	18443	7541738	677948	338723	415719	1939184	1899047	649691	7909	26196	70519	1091213	55149	1026347	272841	179546	56665	24052	232145	25210	436145	151233	19062	29208	596928	1001977	310302	254524	1203715	65080	37118	337763	703461	8480	49057	59408	9617	117555
AL-PO5	Control	9037	167959	23600	98828	68372	26394	572107	189415	711859	500220	18449	5707421	574224	237707	253254	1320076	1260527	552276	5974	26686	44235	869806	39480	1315379	245480	113277	44054	5120	159439	20819	309138	163362	23363	40541	520718	835349	267237	206439	809268	1699	36842	292395	606481	5527	35083	49598	6644	97782
AL-PO6	Control	8900.6	141468	26718.8	494244	90135.6	25879	682724	206597	697616	509209	18332	6.23801e+06	560986	316688	310732	1.46799e+06	1.47052e+06	582066	5642.4	26199	62679.8	913929	49465.8	1.16341e+06	208496	146446	51054	116076	151916	20005.4	381648	144632	18763.2	33294.6	533861	808418	341547	235291	936216	250126	41322	314403	596468	7946.8	41661.6	43679.8	7155	130655
[truncated: 181 more columns]
