# Supplementary material for: Long-term intake of thermo-induced oxidized oil results in anxiety-like and depression-like behaviors: involvement of microglia and astrocytes
Source: Royal Society of Chemistry journal article supplement (doi:10.1039/d3fo05302d), 2024-01-01
Supplement: d3fo05302d2.pdf [file d3fo05302d2.pdf]

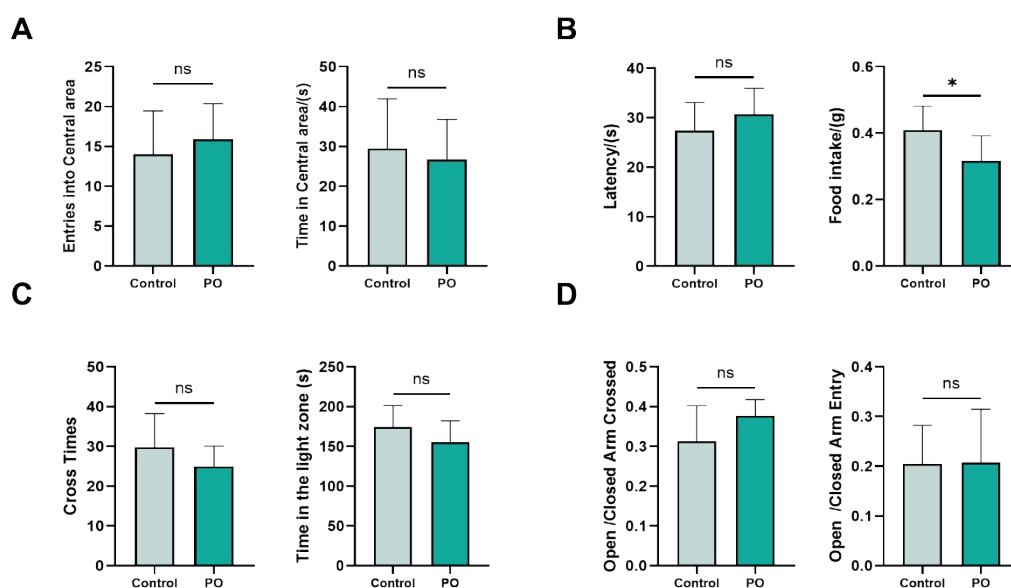

**Fig.S1** The effects of palm oil on anxiety-like behavior in C57 mice. (A) For the OFT, results including the representative tracks of mice, times moving towards central area, central time spent. (B) The eating latency and food intake in the NFST. (C) For the EPMT, results including the representative tracks of mice, open/closed arm crossed and open/crossed arm entry. (D) For the L/DT, cross times between the light and dark zone, and time spent in the light zone. Data are presented as mean  $\pm$  SEM,  $n = 8$ . T-test,  $*p < 0.05$
